# Supplementary material for: Comparative Transcriptomic Analysis of mRNAs, miRNAs and lncRNAs in the Longissimus dorsi Muscles between Fat-Type and Lean-Type Pigs
Source: MDPI journal article supplement (doi:10.3390/biom12091294), 2022-09-13
Supplement: s1 [file s1]

**Table S1.** Primers for overexpression plasmid.

| Gene              | Primer  | Sequence (5'-3')                          | Annealing temperature (°C) |
|-------------------|---------|-------------------------------------------|----------------------------|
| <i>GALNT15-OE</i> | Forward | CCCAAGCTTGCCACCATGGATGTTCTGTAAGGAAGCGAGGC | 65                         |
|                   | Reverse | CGGAATTCCTTCTGACATGGCACTCA                | 65                         |

**Table S2.** Sequence for siRNA.

| Gene             | Primer  | Sequence (5'-3')       |
|------------------|---------|------------------------|
| Negative Control | Forward | UUCUCCGAACGUGUCACGUTT  |
|                  | Reverse | ACGUGACACGUUCGGAGAATT  |
| <i>siRNA-1</i>   | Forward | GGAAGCUUCCAGUAUUATT    |
|                  | Reverse | UAAUACUGGAAAGUCUUCCTT  |
| <i>siRNA-2</i>   | Forward | GCCAUGGACAGACAUUACUTT  |
|                  | Reverse | AGUAAUGUCUGUCCAUGGCTT  |
| <i>siRNA-3</i>   | Forward | GUCAGGAGAAACAAUAAAGATT |
|                  | Reverse | UCUUUAUUGUUCUCCUGACTT  |

**Table S3.** Primers for RT-qPCR.

| Gene                | Primer  | Sequence (5'-3')         | Annealing temperature (°C) |
|---------------------|---------|--------------------------|----------------------------|
| <i>GAPDH</i>        | Forward | TCTTCTGGGTGGCAGTGAT      | 61                         |
|                     | Reverse | GTTTGTGATGGGCGTGAA       | 61                         |
| <i>GOT1</i>         | Forward | CTGGATTCAAAGACATTCGG     | 59                         |
|                     | Reverse | AGGCTGAGTCAAAGAAGGG      | 59                         |
| <i>RBP5</i>         | Forward | TGAACATCAACTTGGCTCTG     | 59                         |
|                     | Reverse | ATGGTCTGGCACTTTCGTC      | 59                         |
| <i>XIRP1</i>        | Forward | AGAGAAGGTGATGGCAGAAC     | 58                         |
|                     | Reverse | GGAGGAACAGAGGCATTATG     | 58                         |
| <i>CNN1</i>         | Forward | TCCTCTGCTCACTTCAACC      | 58                         |
|                     | Reverse | CTCGCAAAGAATGATGCC       | 58                         |
| <i>HSPA6</i>        | Forward | CGCAGAATACCGTGTTTG       | 58                         |
|                     | Reverse | CAGTCTCCTTCATCTTGCTG     | 58                         |
| <i>DAPK3</i>        | Forward | GCATTGCCACAAGATTG        | 58                         |
|                     | Reverse | GAGGATGTAGGTGATGACGC     | 58                         |
| <i>PENK</i>         | Forward | CCTTCTGTGGTTGACTTGATTG   | 58                         |
|                     | Reverse | CAGCATTTATGGGCGTTTG      | 58                         |
| <i>MTFP1</i>        | Forward | GCTGATGCCATTGACAAAG      | 58                         |
|                     | Reverse | ATAGTGAAGCCTGGGATGC      | 58                         |
| <i>PERP</i>         | Forward | GCTGTGGTGGAAGTGTTCTC     | 58                         |
|                     | Reverse | GCAGGAAGACAAGCATTTG      | 58                         |
| <i>LOC100157061</i> | Forward | GGAATCCAAGAACAATCAGCATCT | 59                         |
|                     | Reverse | AGTGGGAGTCTTGAACAAAG     | 59                         |
| <i>LOC100622439</i> | Forward | TCTCCTCGTATCTCAGTCTGTTC  | 59                         |
|                     | Reverse | GTAAGGTGATAAGTGCTGCCATAG | 59                         |
| <i>ZNF648</i>       | Forward | CGAGCACCACGGAGATATTCAA   | 60                         |
|                     | Reverse | CAGAGTTCTTGTCAGCCAGG     | 60                         |
| <i>LOC106505263</i> | Forward | TACGAGTTCACCTTGACGATGG   | 60                         |
|                     | Reverse | AAGTCAGGAGGCAGGTAGTTC    | 60                         |
| <i>LOC110255980</i> | Forward | TGGCAAGGGTCACTCTAGGA     | 59                         |
|                     | Reverse | GCTGGGGACCTTTCATCTT      | 59                         |
| <i>LOC100623270</i> | Forward | TGTCACCCTGGAAATGGAAT     | 59                         |
|                     | Reverse | TGTAATGTGCTTGTCTGCGTAAC  | 59                         |
| <i>LOC106505720</i> | Forward | GAGGTTCTGCTTCCAGTGTCTTA  | 60                         |
|                     | Reverse | GCCACGCTTACCTTCTTGTTATTG | 60                         |
| <i>LOC110255759</i> | Forward | CTGCTGATGGACTCTGGGTTT    | 60                         |
|                     | Reverse | CCTCTTCTGCTGGCTCTCTTT    | 60                         |
| <i>LOC110257277</i> | Forward | TCCTCCAACCTCCATTCTTCATT  | 59                         |
|                     | Reverse | CCTCAGCAACAACACACCAAT    | 59                         |
| <i>LOC110260256</i> | Forward | GGCTGGAGGGAGAGATTGAAATG  | 61                         |

|                       |         |                             |    |
|-----------------------|---------|-----------------------------|----|
|                       | Reverse | CTGCTTGGTTCTGCGTTGTTG       | 61 |
| <i>ssc-miR299-5p</i>  |         | TTACTACACCCGTCCCGTGC        | 60 |
| <i>ssc-miR397-5p</i>  |         | CAACTATTCAGGGCGGAGCAG       | 60 |
| <i>ssc-miR1156-5p</i> |         | ACTCATGAGTCCACCTGCCG        | 60 |
| <i>ssc-miR204-5p</i>  |         | AACACGCTCTCTCCAGCCTC        | 60 |
| <i>ssc-miR190-3p</i>  |         | AGTATTCTGTGCTGCTCGGGT       | 60 |
| <i>ssc-let-7a</i>     |         | CAGCGCTGAGGTAGTAGGTTGTATAGT | 60 |
| <i>ssc-miR1358-5p</i> |         | TCAGCTTCGGGCCTAGATCCT       | 60 |
| <i>ssc-miR1379-3p</i> |         | CTGGGATCTCTGGGTTTGGGC       | 60 |
| <i>ssc-miR1379-5p</i> |         | TGTGCCAGTGAAACCAGGTCT       | 60 |
| <i>ssc-miR356-5p</i>  |         | TATGTTGGGTCTGGGGTGTGT       | 60 |
| <i>ssc-miR573-5p</i>  |         | TATCGTTGGGTCTGGGGTGT        | 60 |
| <i>ssc-miR-10383</i>  |         | GTAACCTGACGTCTTGGCAGT       | 60 |

---
